# Supplementary material for: The Antiviral Activity of Varenicline against Dengue Virus Replication during the Post-Entry Stage
Source: MDPI journal article supplement (doi:10.3390/biomedicines11102754), 2023-10-11
Supplement: s1 [file s1]

## Supplementary materials and Figures

**Supplementary Table 1.** Primers used for cloning DENV-2 NS2B-NS3 gene and FRET substrates into the expression vector pcDNA3.1-HisC

| Primer names                  | Primer sequences                                                                                        |
|-------------------------------|---------------------------------------------------------------------------------------------------------|
| DEN2-NS2b-HindIII AVI tag For | 5'-ttaagcttaccatgggcctgaacgacatcttcgaggcgcagaagattgaatggcatgaaggtggcgggtggcagcagctggccattaaatgaggcta-3' |
| DEN2-protease-F2A-BamHI-Rev   | 5'ttggatccgggccccggggttgactcaacgtctcctgccaacttgagcaaatcaaagttcttctccggctgcaaattccta-3                   |
| CFP-BamHI-For                 | 5'-ccaggatccatggtagcaagggcgaggaac-3'                                                                    |
| CFP-lngg-trrg-YFP-Rev         | 5'-catccacgacgagtgtatgccctccgttaaggctggttttgtacagctcgt-3'                                               |
| CFP-lngg-trrg-YFP-For         | 5'-agccttaacggaggggcatacactcgtcgtgggatggtagcaaaggcgaaga-3'                                              |
| YFP-XhoI-Rev                  | 5'-agactcgagtttgtacagttcgtccataccca-3'                                                                  |

### A. pcDNA-DEN2\_NS2BNS3

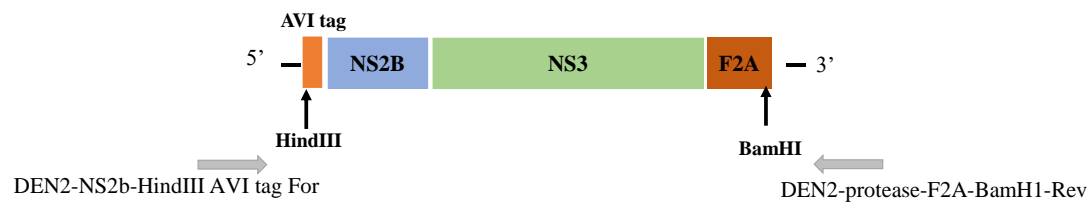

### B. pcDNA-CFP-trrg-YFP

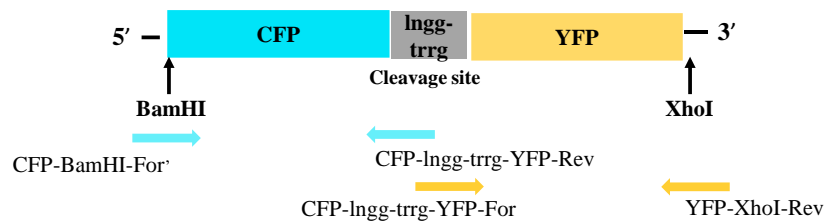

**Supplementary Figure 1. Construction and cloning DENV-2 NS2B/NS3, and the FRET substrate CFP-trrg-YFP into pcDNA3.1-HisC plasmid.** The DENV-2 NS2BNS3 gene was amplified using reverse transcription polymerase chain reaction (RT-PCR) with RNA genomes from DENV-2 strain 16681 as the template. The amplified product was then cloned into pcDNA3.1-HisC plasmid, resulting in the creation of a plasmid named pcDNA-DEN2\_NS2BNS3 (A). To generate fluorescence resonance energy transfer (FRET) substrates, cDNA fragments of CFP-lngg-trrg and lngg-trrg-YFP were separately amplified by PCR and ligated together. The ligated fragment was cloned into pcDNA3.1-HisC, yielding the plasmid pcDNA-CFP-trrg-YFP (B).

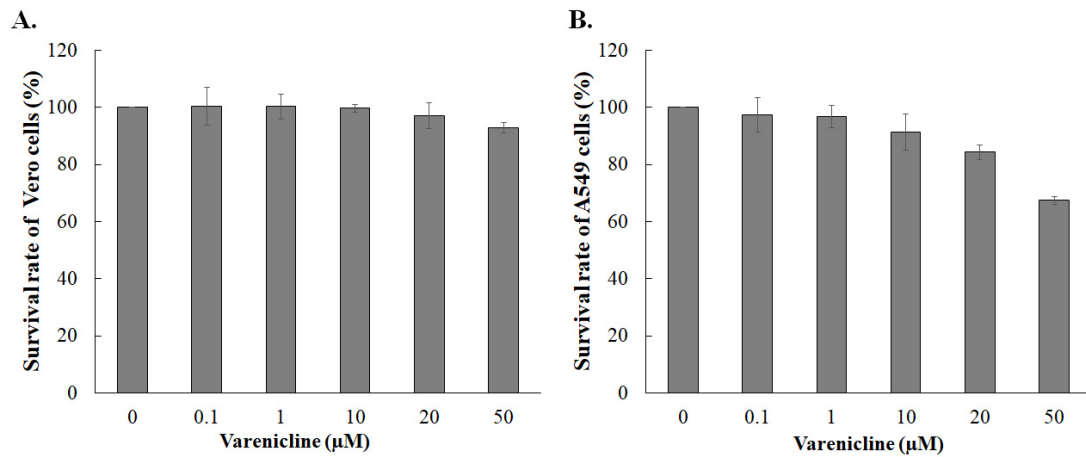

**Supplementary Figure 2. The cytotoxicity of varenicline on Vero and A549 cells assessed using the MTT assay.** Vero (A) and A549 (B) cells were treated with different concentrations of varenicline (0, 0.1, 10, 20, and 50  $\mu\text{M}$ ) and incubated for 96 hours. After the incubation period, the cells were exposed to MTT solution and incubated for an additional 4 hours at 37  $^{\circ}\text{C}$ . Cell viability (%) was determined by measuring the reduction of MTT.

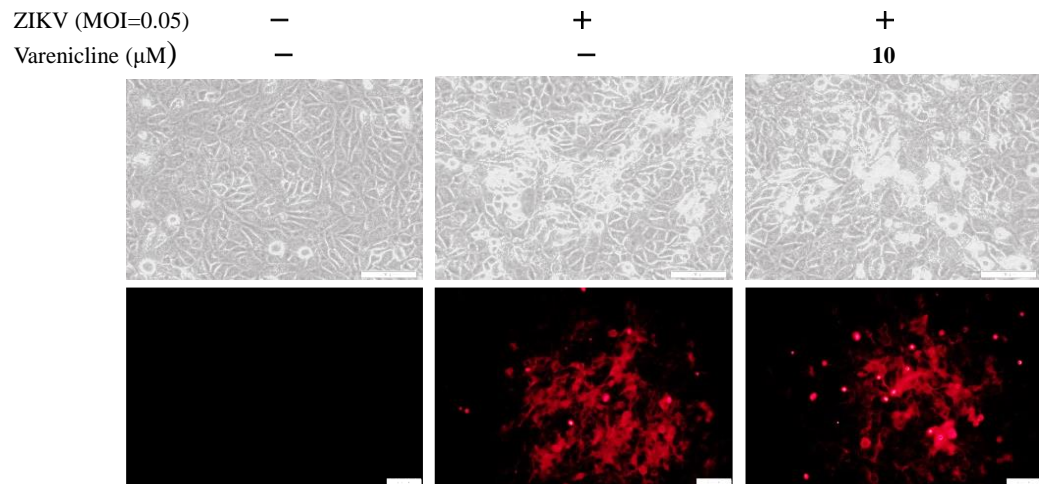

**Supplementary Figure 3.** Inhibitory effect of varenicline on cytopathic effect in the infected cells with ZIKV. Vero cells were infected with ZIKV at a MOI of 0.05, treated with varenicline at a concentration of 10 μM immediately after infection. The inhibitory effect of varenicline on virus-induced cytopathic effects was observed and recorded using an inverted microscope 96 hours post infection. ZIKV NS1 expression was examined using IFA with anti-ZIKV NS1 antibodies, along with secondary antibodies conjugated with AF555. Scale bar, 100 μm

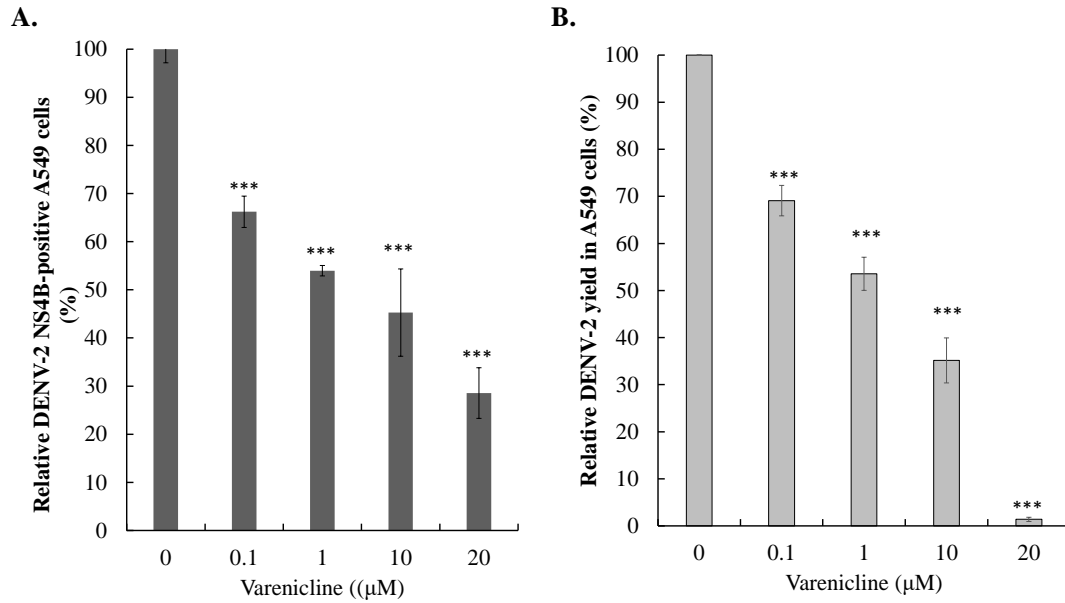

**Supplementary Figure 4. The concentration-dependent inhibition of varenicline on DENV-2 infectivity in A549 cells.** The cells were infected with DENV2 at a multiplicity of infection (MOI) of 0.05 and immediately treated with varying concentrations of varenicline. The inhibitory effect of varenicline on virus-induced cytopathic effects was observed and recorded using an inverted microscope 96 hours post-infection. Immunofluorescence assay (IFA) was performed on the treated/infected cells using anti-DENV-2 NS4B antibodies and secondary antibodies conjugated with AF555. The ratio of NS4B-positive cells to the total number of nuclei stained with DAPI was calculated to determine DENV-2 infectivity (A). Additionally, the virus yield was quantified using the TCID50 assay, and the relative residual virus yield in the treated/infected cells was calculated based on the virus yield in the cultured media of mock-treated/infected cells, which was used as a reference (100%) (B). Data were collected from three independent experiments. \*\*\*, p value<0.001 compared with mock-treated/infected cells.
